# Supplementary material
Source: MDPI journal article supplement (https://www.mdpi.com/2073-4441/15/3/590)
Supplement: s1 [file s1 › water-2095699-supplementary.pdf]

# PGPR promotes the recovery of submerged macrophytes via indigenous microbiome modulations under combined abiotic stress

Yahua Li<sup>1</sup>, Xiangfen Liu<sup>2</sup>, Qianzheng Li<sup>2</sup>, Yao Guo<sup>2</sup>, Yi Zhang<sup>2</sup>, Chuan Wang<sup>2,3,4,\*</sup>, Qiaohong Zhou<sup>2</sup> and Zhenbin Wu<sup>1,2</sup>

<sup>1</sup> School of Environmental Studies, China University of Geosciences, Wuhan 430074, PR China

<sup>2</sup> State Key Laboratory of Freshwater Ecology and Biotechnology, Institute of Hydrobiology, Chinese Academy of Sciences, Wuhan 430072, PR China

<sup>3</sup> Faculty of Resources and Environmental Science, Hubei University, Wuhan 430062, PR China

<sup>4</sup> Hubei Key Laboratory of Regional Development and Environmental Response, Hubei University, Wuhan 430062, PR China

\* Corresponding author: Chuan Wang

E-mail: [wangchuan@hubu.edu.cn](mailto:wangchuan@hubu.edu.cn) Tel: +86 27 88668078; Fax: +86 27 88668078

Address: Faculty of Resources and Environmental Science, Hubei University, No. 368 Youyi Avenue, Wuchang District, Wuhan 430062, PR China

## 1. Materials and methods

### 1.1. 16S rRNA gene sequencing

The 27F (5'-AGAGTTTGATCCTGGCTCAG-3') and 1492R (5'-GGTTACCTTGTTACGACTT-3') universal primers were used to amplify the 16S rRNA incomplete gene. The PCR product was purified, cloned into the pMD18-T vector, and then transferred to *Escherichia coli* DH5 $\alpha$  competent cells through heat shock transformation. Sequencing was done on the positive clones.

### 1.2. 16S rRNA gene high throughput sequencing technique

Briefly, the V3–V4 hypervariable regions of bacteria 16S rRNA gene were amplified with primers 338F (5'-ACTCCTACGGGAGGCAGCAG-3') and 806R (5'-GGACTACHVGGGTWTCTAAT-3') [1]. PCR was performed using the following program: 3 min of denaturation at 95 °C, 27 cycles of 30 s at 95 °C, 30s for annealing at 55 °C, and 45 s for elongation at 72 °C, and a final extension at 72 °C for 10 min. The raw sequenced reads of the 16S rRNA gene were quality-filtered by fastp version 0.20.0 [2] and merged by FLASH version 1.2.7 [3] with the following criteria: (i) the 300 bp reads were truncated at any site receiving an average quality score of <20 over a 50 bp sliding window, and the truncated reads shorter than 50 bp were discarded, reads containing ambiguous characters were also discarded; (ii) only overlapping sequences longer than 10 bp were assembled according to their overlapped sequence. The maximum mismatch ratio of overlap region is 0.2. Reads that could not be assembled were discarded; (iii) Samples were distinguished according to the barcode and primers, and the sequence direction was adjusted, exact barcode matching, 2 nucleotide mismatch in primer matching. UPARSE (version 7.1 <http://drive5.com/uparse/>) was used to cluster operational taxonomic units (OTUs) with 97% similarity [4,5]. The resampled OTU table was used for subsequent community analysis. The taxonomy of each OTU representative sequence was analyzed by RDP Classifier version 2.2 [6] against the 16S rRNA database (Silva v138) using confidence threshold of 0.7. All of the OTUs belonged to bacteria.

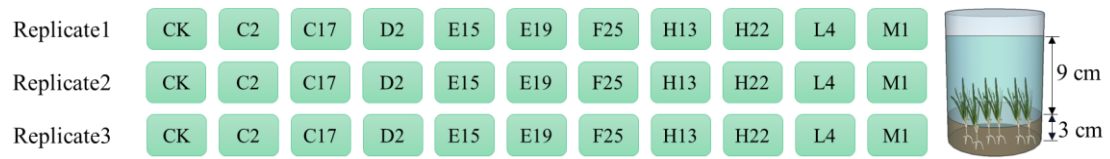

**Figure S1.** A schematic drawing in one environmental conditions.

**Table S1.** Environmental characteristics of the living position of submerged macrophytes and isolated PGPR strain numbers.

| Location                             | Sediment OM (%) | Light intensity (%) | Strain source                 | Number of cultivated isolates | Code name |
|--------------------------------------|-----------------|---------------------|-------------------------------|-------------------------------|-----------|
| Tanglinghu (Donghu Lake, Wuhan City) | 3.12 ± 0.16     | 100                 | <i>Najas marina</i>           | 15                            | A1-15     |
|                                      |                 |                     | <i>Hydrilla verticillata</i>  | 12                            | B1-12     |
| Shahu Lake, Yinchuan City            | 2.06 ± 0.06     | 100                 | <i>Chara vulgaris</i>         | 25                            | C1-25     |
| Maojiabu (West Lake, Hangzhou City)  | 15.24 ± 0.03    | 1                   | <i>Vallisneria natans</i>     | 30                            | D1-D30    |
|                                      | 15.94 ± 0.10    | 4                   | <i>Vallisneria natans</i>     | 15                            | E1-E15    |
|                                      | 11.51 ± 0       | 3                   | <i>Vallisneria natans</i>     | 30                            | F1-F30    |
|                                      |                 | 3                   | <i>Hydrilla verticillata</i>  | 9                             | G1-9      |
|                                      | 12.36 ± 0.16    | 100                 | <i>Vallisneria natans</i>     | 31                            | H1-H31    |
|                                      |                 | 100                 | <i>Hydrilla verticillata</i>  | 22                            | I1-22     |
|                                      |                 | 56                  | <i>Potamogeton maackianus</i> | 20                            | J1-20     |
|                                      |                 | 56                  | <i>Potamogeton wrightii</i>   | 15                            | K1-15     |
| Xilihu (West Lake, Hangzhou City)    | 17.76 ± 0.02    | 34                  | <i>Vallisneria natans</i>     | 19                            | L1-L19    |
| Microcosm system                     | 17.35 ± 0.52    | 100                 | <i>Vallisneria natans</i>     | 9                             | M1-9      |

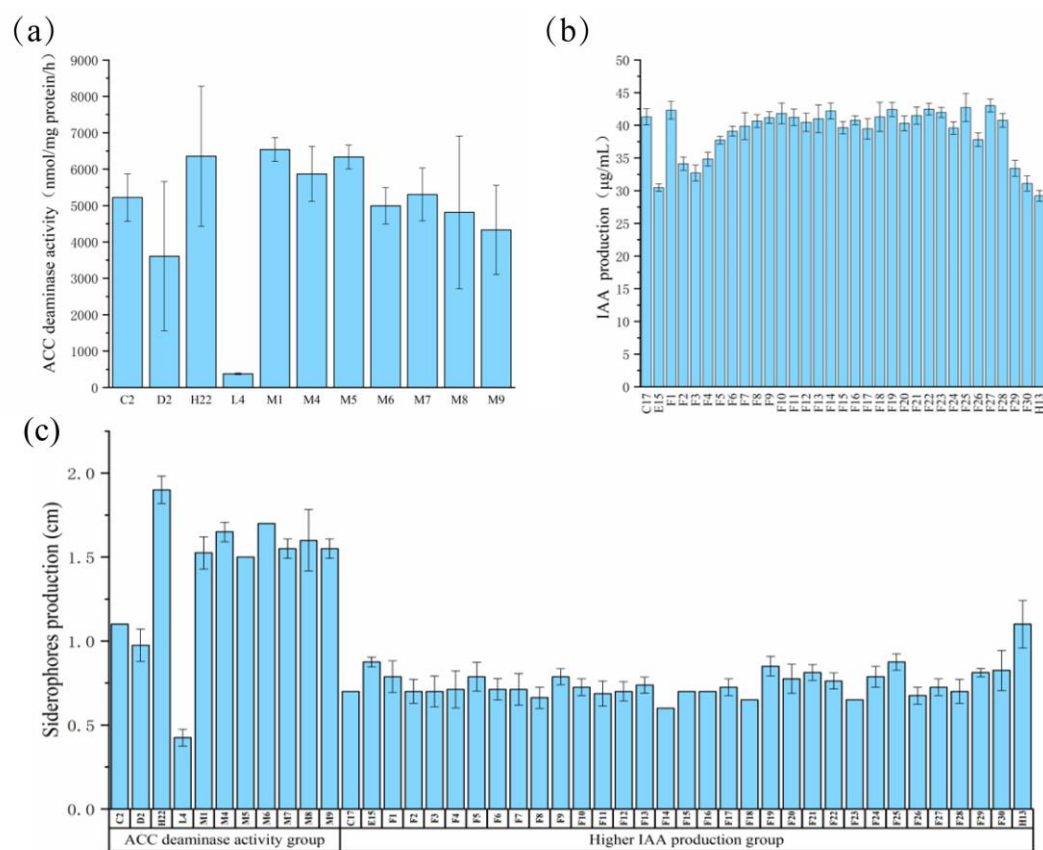

**Figure S2.** The growth-promoting properties of the isolated strains and correlation analysis; (a) ACC deaminase activity; (b) IAA production ( $> 29 \mu\text{g mL}^{-1}$ ); (c) Siderophore production.

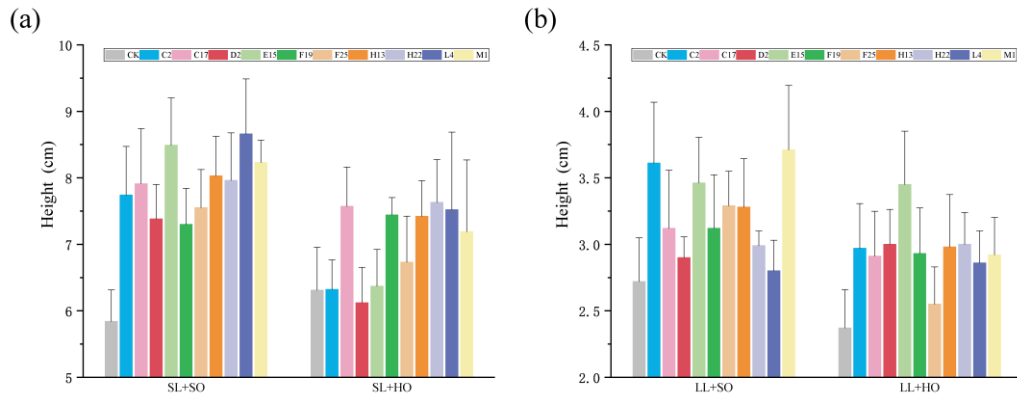

**Figure S3.** Shoot height of *V. natans* in different PGPR inoculation treatments under four stress conditions; (a) Suitable light intensity and suitable sediment organic matter load (SL+SO) and suitable light intensity and high sediment organic matter load (SL+HO); (b) Low light intensity and suitable sediment organic matter load (LL + SO) and low light intensity and high sediment organic matter load (LL+HO). CK: non-inoculation control; C2, C17, D2, E15, F19, F25, H13, H22, L4 and M1 present the inoculation treatments with the corresponding strains.

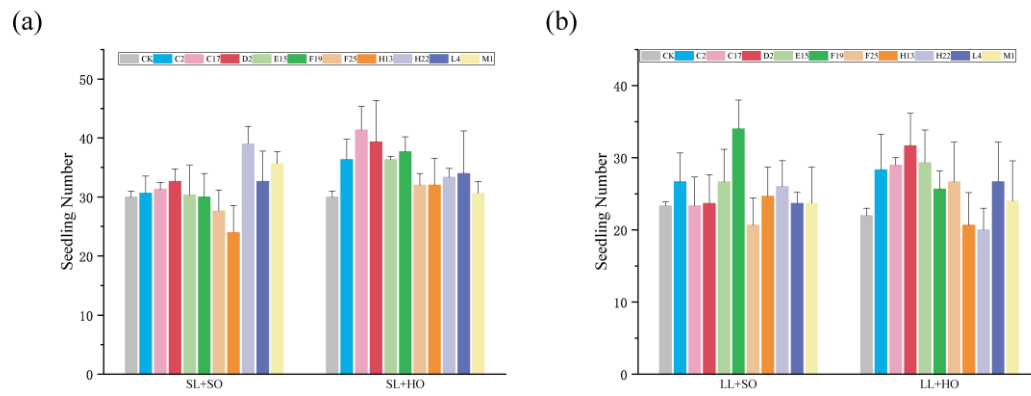

**Figure S4.** Seedling numbers of *V. natans* in different PGPR inoculation treatments under four environments; (a) Suitable light intensity and suitable sediment organic matter load (SL+SO) and suitable light intensity and high sediment organic matter load (SL+HO); (b) Low light intensity and suitable sediment organic matter load (LL + SO) and low light intensity and high sediment organic matter load (LL+HO). CK: non-inoculation control; C2, C17, D2, E15, F19, F25, H13, H22, L4 and M1 present the inoculation treatments with the corresponding strains.

**Table S2** The highest growth promoting effect and their significant differences under the four environments ( $p < 0.05$ , Univariate ANOVA).

| Stress Conditions | The Optimal Strain | N  | Mean  | Std. Deviation | 95% Confidence Interval for Mean |             | Subset |     |
|-------------------|--------------------|----|-------|----------------|----------------------------------|-------------|--------|-----|
|                   |                    |    |       |                | Lower Bound                      | Upper Bound | 1      | 2   |
| SL+SO             | L4                 | 10 | 1.483 | 0.142          | 1.382                            | 1.584       | a      |     |
| SL+HO             | H22                | 10 | 1.209 | 0.102          | 1.133                            | 1.267       |        | b   |
| LL+SO             | M1                 | 10 | 1.364 | 0.178          | 1.237                            | 1.491       | a      |     |
| LL+HO             | E15                | 10 | 1.456 | 0.169          | 1.335                            | 1.577       | a      |     |
| Sig.              |                    |    |       |                |                                  |             | 1      | 0.1 |

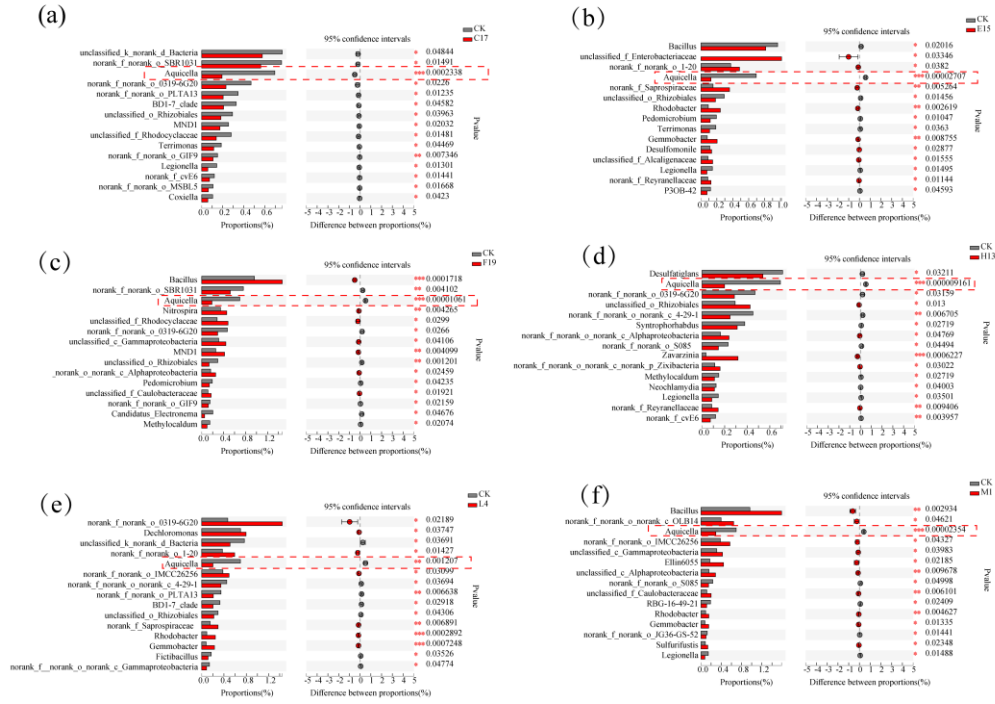

**Figure S5.** Relative abundance of the 15 top-ranked genera of bacteria with significant differences between inoculated group and uninoculated control group in the rhizosphere of *V. natans* seedlings under SL+SO. CK: uninoculated control; C17, E15, F19, H13, L4 and M1 present the inoculated group with the corresponding strains. Asterisk indicates significant difference between CK and the inoculated group ( $p < 0.05$ , Student's t test).

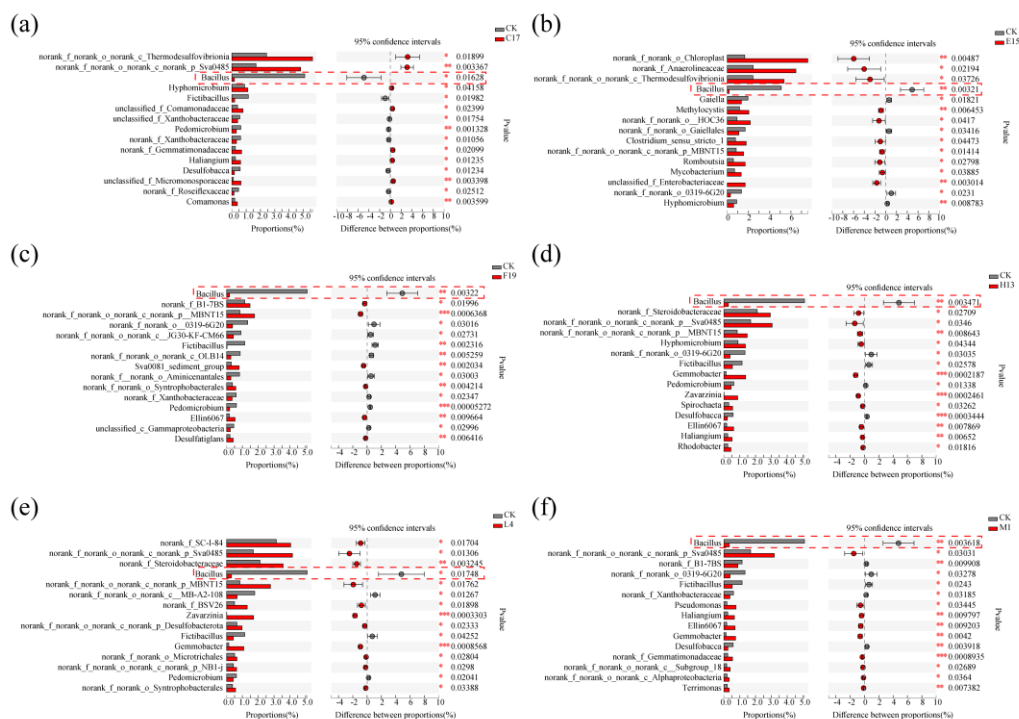

**Figure S6.** Relative abundance of the 15 top-ranked genera of bacteria with significant differences between inoculated group and uninoculated control group at genus level in the rhizosphere of *V. natans* seedlings under SL+HO. CK: uninoculated control; C17, E15, F19, H13, L4 and M1 present the inoculated group with the corresponding strains. Asterisk indicates significant difference between CK and the inoculated group ( $p < 0.05$ , Student's *t* test).

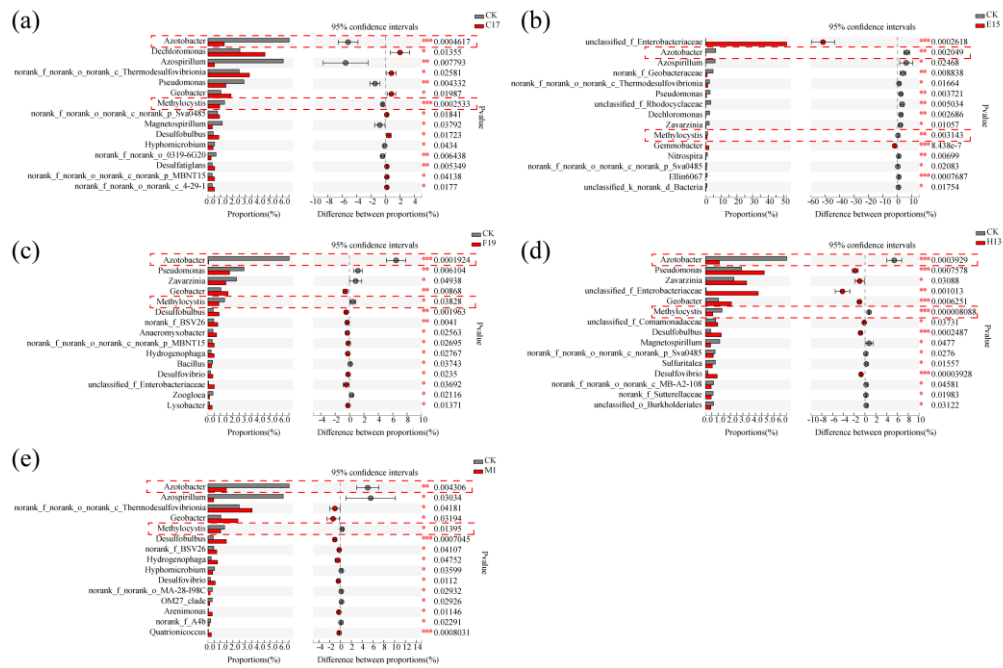

**Figure S7.** Relative abundance of the 15 top-ranked genera of bacteria with significant differences between inoculated group and uninoculated control group at genus level in the rhizosphere of *V. natans* seedlings under LL+SO. CK: uninoculated control; C17, E15, F19, H13 and M1 present the inoculated group with the corresponding strains. Asterisk indicates significant difference between CK and the inoculated group ( $p < 0.05$ , Student's t test).



## References.

1. Yang, H.; Wu, J.; Huang, X.; Zhou, Y.; Zhang, Y.; Liu, M.; Liu, Q.; Ke, S.; He, M.; Fu, H.; Fang, S.; Xiong, X.; Jiang, H.; Chen, Z.; Wu, Z.; Gong, H.; Tong, X.; Huang, Y.; Ma, J.; Gao, J.; Charlier, C.; Coppieters, W.; Shagam, L.; Zhang, Z.; Ai, H.; Yang, B.; Georges, M.; Chen, C.; Huang, L. ABO genotype alters the gut microbiota by regulating GalNAc levels in pigs. *Nature* **2022**, *606*, 358–367.
2. Chen, S.F.; Zhou, Y.Q.; Chen, Y.R.; Gu, J. Fastp: an ultra-fast all-in-one FASTQ preprocessor. *Bioinformatics* **2018**, *34*, 884–890.
3. Magoč, T.; Salzberg, S.L. FLASH: fast length adjustment of short reads to improve genome assemblies. *Bioinformatics* **2011**, *27*, 2957–2963.
4. Stackebrandt, E.; Goebel, B.M.. A place for DNA-DNA reassociation and 16S ribosomal-RNA sequence-analysis in the present species definition in bacteriology. *Int. J. Syst. Bacteriol.* **1994**, *44*, 846–849.
5. Edgar, R.C. UPARSE: highly accurate OTU sequences from microbial amplicon reads. *Nat. Methods* **2013**, *10*, 996–998.
6. Wang, J.; Yu, D. Influence of sediment fertility on morphological variability of *Vallisneria spiralis* L. *Aquat. Bot.* **2007**, *87*, 127–133.
